# Supplementary material
Source: publisher site journal article supplement (https://www.dovepress.com/article/227191)
Supplement: Supplementary file 1 [file get_supplementary_file.php]

| **Supplemental Table 1**. Characteristics by reported difficulty with coming to dialysis | | | |
| --- | --- | --- | --- |
| **Characteristic** | **Difficult**  **(N=184, 23%)** | **Not Difficult**  **(N=615, 77%)** | **P*** |
| Mean (SD) age, years | 57.93 (13.81) | 56.85 (0.57) | 0.36 |
| Sex |  |  |  |
| Male | 57.61% (106) | 53.98% (332) | 0.39 |
| Female | 42.39% (78) | 46.02% (283) |  |
| Race, % (N)a |  |  |  |
| Black | 94.74% (162) | 95.48% (549) | 0.69 |
| Not Black | 5.26% (6) | 4.52% (24) |  |
| Cause of ESRD, % (N) |  |  |  |
| Hypertension | 59.78% (110) | 56.59% (348) | 0.42 |
| Diabetes | 16.30% (30) | 20.16% (124) |  |
| Glomerulonephritis | 3.80% (7) | 5.69% (35) |  |
| Unknown/Other | 20.11% (37) | 17.56% (108) |  |
| Depression/Anxiety, % (N)b |  |  |  |
| Yes | 16.76% (30) | 6.95% (42) | <0.0001 |
| No | 83.28% (149) | 93.05% (562) |  |
| Memory Impairment, % (N)c |  |  |  |
| Yes | 16.67% (30) | 12.75% (77) | 0.40 |
| No | 83.35% (150) | 87.25% (527) |  |
| Employment Status, % (N)d |  |  |  |
| Employed | 7.10% (11) | 8.92% (42) | 0.09 |
| Unemployed Disabled | 58.71% (91) | 56.05% (264) |  |
| Unemployed Other | 28.39% (44) | 32.91% (155) |  |
| Other | 5.81% (9) | 2.12% (10) |  |
| Comorbid Conditions, % (N)e |  |  |  |
| Diabetes | 9.34% (17) | 10.59% (65) | 0.63 |
| Hypertension | 76.37% (139) | 74.27% (456) | 0.57 |
| Heart Failure | 4.95% (9) | 5.21% (32) | 0.89 |
| Cancer | 3.85% (7) | 1.47% (9) | 0.07 |
| Pain | 7.69% (14) | 8.63% (53) | 0.69 |
| COPD | 8.24% (15) | 5.21% (32) | 0.13 |
| CVD | 23.63% (43) | 19.06% (117) | 0.18 |
| Vascular Access, % (N) |  |  |  |
| Fistula | 21.74% (40) | 33.50% (206) | 0.001 |
| Graft | 21.74% (40) | 24.72% (152) |  |
| Catheter | 56.52% (104) | 41.79% (257) |  |
| *using t-test for continuous variables and chi-square or exact test for categorical variables. | | |  |
| a .N= 741, b. N=783, c. N=784, d. N=626, e. N=796 | | |  |

| **Supplemental Table 2**. Characteristics by reported difficulty with completing dialysis | | | | | | |
| --- | --- | --- | --- | --- | --- | --- |
| **Characteristic** | | **Difficult (N=192, 24%)** | **Not Difficult**  **(N=607, 76%)** | | | **P*** |
| Mean (SD) age, years | | 58.63(14.05) | 56.62 (14.09) | | | 0.08 |
| Sex | |  |  | | |  |
| Male | | 49.48% (95) | 56.51% (343) | | | 0.09 |
| Female | | 50.52% (97) | 43.49% (264) | | |  |
| Race, % (N)a | |  |  | | |  |
| Black | | 93.37% (169) | 95.93% (542) | | | 0.16 |
| Not Black | | 6.63% (10) | 4.07% (20) | | |  |
| Cause of ESRD, % (N) | |  |  | | |  |
| Hypertension | | 55.73% (107) | 57.83% (351) | | | 0.60 |
| Diabetes | | 17.71% (34) | 19.77% (120) | | |  |
| Glomerulonephritis | | 5.21% (10) | 5.27% (32) | | |  |
| Unknown/Other | | 21.35% (41) | 17.13% (104) | | |  |
| Depression/Anxiety, % (N)b | |  |  | | |  |
| Yes | | 16.67% (31) | 6.87% (41) | | | <0.0001 |
| No | | 83.33% (155) | 93.13% (556) | | |  |
| Memory Impairment, % (N)c | |  |  | | |  |
| Yes | | 17.117% (32) | 12.56% (75) | | | 0.11 |
| No | | 82.89% (155) | 87.44% (522) | | |  |
| Employment Status, % (N)d | |  |  | | |  |
| Employed | | 6.41% (10) | 9.15% (43) | | | 0.09 |
| Unemployed Disabled | | 57.69% (90) | 56.38% (265) | | |  |
| Unemployed Other | | 30.13% (47) | 32.34% (152) | | |  |
| Other | | 5.77% (9) | 2.13% (10) | | |  |
| Comorbid Conditions, % (N)e | |  |  | | |  |
| Diabetes | | 10.47% (20) | 10.25% (62) | | | 0.93 |
| Hypertension | | 76.96% (147) | 74.05% (448) | | | 0.42 |
| Heart Failure | | 4.19% (8) | 5.45% (33) | | | 0.49 |
| Cancer | | 3.66% (7) | 1.49% (9) | | | 0.08 |
| Pain | | 7.85% (15) | 8.60% (52) | | | 0.75 |
| COPD | | 7.85% (15) | 5.29% (32) | | | 0.19 |
| CVD | | 21.47% (41) | 19.67% (119) | | | 0.59 |
| Vascular Access, % (N) | |  |  | | |  |
| Fistula | | 20.83 (40) | 33.94% (206) | | | 0.0001 |
| Graft | | 21.35% (41) | 24.88% (151) | | |  |
| Catheter | | 57.81% (111) | 41.19% (250) | | |  |
| *using t-test for continuous variables and chi-square or exact test for categorical variables. | | | | | | |
| a .N= 741, b. N=783, c. N=784, d. N=626, e. N=796 | | | | | | |
| **Supplemental Table 3.** Characteristics by reported difficulty with fluid restrictions | | | | | | |
| **Characteristic** | **Difficult**  **(N=250, 31%)** | | | **Not Difficult**  **(N=549,69%)** | **P*** | |
| Mean (SD) age, years | 56.45 (14.33) | | | 57.40 (13.99) | 0.38 | |
| Sex |  | | |  |  | |
| Male | 60.40% (151) | | | 52.28% (287) | 0.03 | |
| Female | 39.60% (99) | | | 47.72% (262) |  | |
| Race, % (N)a |  | | |  |  | |
| Black | 95.28% (222) | | | 95.32% (489) | 0.98 | |
| Not Black | 4.72% (11) | | | 3.83% (24) |  | |
| Cause of ESRD, % (N) |  | | |  |  | |
| Hypertension | 58.40% (146) | | | 56.83% (312) | 0.30 | |
| Diabetes | 15.60% (39) | | | 20.95% (115) |  | |
| Glomerulonephritis | 5.60% (14) | | | 5.10% (28) |  | |
| Unknown/Other | 20.40% (51) | | | 17.12% (94) |  | |
| Depression/Anxiety, % (N)b |  | | |  |  | |
| Yes | 13.88 % (34) | | | 7.06% (38) | 0.002 | |
| No | 86.12% (211) | | | 92.94% (500) |  | |
| Memory Impairment, % (N)c | | | |  |  | |
| Yes | 13.06% (32) | | | 13.91% (75) | 0.75 | |
| No | 86.94% (213) | | | 86.09% (464) |  | |
| Employment Status, % (N)d |  | | |  |  | |
| Employed | 9.84% (19) | | | 7.85% (34) | 0.09 | |
| Unemployed Disabled | 57.51% (111) | | | 56.35% (244) |  | |
| Unemployed Other | 27.46% (53) | | | 33.72% (146) |  | |
| Other | 5.18% (10) | | | 2.08% (9) |  | |
| Comorbid Conditions, % (N)e | | | |  |  | |
| Diabetes | 7.66% (19) | | | 11.50% (63) | 0.10 | |
| Hypertension | 77.82% (193) | | | 73.36% (402) | 0.18 | |
| Heart Failure | 5.24% (13) | | | 5.11% (28) | 0.94 | |
| Cancer | 2.02% (5) | | | 2.01% (11) | 0.99 | |
| Pain | 5.24% (13) | | | 9.85% (54) | 0.03 | |
| COPD | 5.65% (14) | | | 6.02% (33) | 0.83 | |
| CVD | 20.56% (51) | | | 19.89% (109) | 0.83 | |
| Vascular Access, % (N) |  | | |  |  | |
| Fistula | 27.20% (86) | | | 32.42% (178) | 0.005 | |
| Graft | 19.20% (48) | | | 26.23% (144) |  | |
| Catheter | 53.60% (134) | | | 41.35% (227) |  | |
| *using t-test for continuous variables and chi-square or exact test for categorical variables. | | | | | | |
| a .N= 741, b. N=783, c. N=784, d. N=626, e. N=796 | | | | | | |

| **Supplemental Table 4.**. Characteristics by reported difficulty with diet restrictions | | | |
| --- | --- | --- | --- |
| **Characteristic** | **Difficult (N=278, 35%)** | **Not Difficult**  **(N=521, 65%)** | **P*** |
| Mean (SD) age, years | 56.87 (13.97) | 57.22 (14.18) | 0.74 |
| Sex |  |  |  |
| Male | 56.12% (156) | 54.13% (282) | 0.59 |
| Female | 43.88% (122) | 45.87% (239) |  |
| Race, % (N)a |  |  |  |
| Black | 97.31% (253) | 94.24% (458) | 0.06 |
| Not Black | 2.16% (6) | 5.76% (24) |  |
| Cause of ESRD, % (N) |  |  |  |
| Hypertension | 58.27% (162) | 56.81% (296) | 0.67 |
| Diabetes | 17.99% (50) | 19.96% (104) |  |
| Glomerulonephritis | 4.32% (12) | 5.76% (30) |  |
| Unknown/Other | 19.42% (54) | 17.47% (91) |  |
| Depression/Anxiety, % (N)b |  |  |  |
| Yes | 15.19% (41) | 6.04% (31) | <0.0001 |
| No | 84.81% (229) | 93.96% (482) |  |
| Memory Impairment, % (N)c |  |  |  |
| Yes | 14.71% (40) | 13.09% (67) | 0.53 |
| No | 85.29% (232) | 86.91% (445) |  |
| Employment Status, % (N)d |  |  |  |
| Employed | 9.71% (20) | 7.86% (33) | 0.12 |
| Unemployed Disabled | 59.71% (123) | 55.24% (232) |  |
| Unemployed Other | 26.21% (54) | 34.52% (145) |  |
| Other | 4.37% (9) | 2.38% (10) |  |
| Comorbid Conditions, % (N)e |  |  |  |
| Diabetes | 10.87% (30) | 10.00% (52) | 0.70 |
| Hypertension | 76.45% (211) | 73.85% (384) | 0.42 |
| Heart Failure | 5.07% (14) | 5.19% (27) | 0.94 |
| Cancer | 2.90% (8) | 1.54% (8) | 0.19 |
| Pain | 6.88% (19) | 9.23% (48) | 0.26 |
| COPD | 6.16% (17) | 5.77% (30) | 0.82 |
| CVD | 20.65% (57) | 19.81% (103) | 0.78 |
| Vascular Access, % (N) |  |  |  |
| Fistula | 26.26% (73) | 33.21% (173) | 0.05 |
| Graft | 23.02% (64) | 24.57% (128) |  |
| Catheter | 50.72% (141) | 42.23% (220) |  |
| *using t-test for continuous variables and chi-square or exact test for categorical variables. | | | |
| a .N= 741, b. N=783, c. N=784, d. N=626, e. N=796 | | | |

| **Supplemental Table 5.**  Characteristics by reported difficulty with taking medications and diet restrictions | | | | |
| --- | --- | --- | --- | --- |
| **Characteristic** | **Neither Difficult (N=502, 63%)** | **Medications or Diet Difficult (N=175, 22%)** | **Both Difficult (N=122, 15%)** | **P*** |
| Mean (SD) age, years | 57.37 (14.07) | 56.94 (14.49) | 56.23 (13.70) | 0.71 |
| Sex |  |  |  |  |
| Male | 53.98% (271) | 54.86% (96) | 58.20% (71) | 0.7 |
| Female | 46.02% (231) | 45.14 (79) | 41.80% (51) |  |
| Race, % (N) |  |  |  |  |
| Black | 94.43% (441) | 95.76% (158) | 98.25% (112) | 0.21 |
| Not Black | 5.57% (23) | 4.24% (5) | 1.75% (20) |  |
| Cause of ESRD,  % (N) |  |  |  |  |
| Hypertension | 56.97% (286) | 56.00% (98) | 60.66% (74) | 0.74 |
| Diabetes | 19.92% (100) | 21.14% (37) | 21.15% (33) |  |
| Glomerulonephritis | 5.58% (28) | 4.00% (7) | 5.74% (7) |  |
| Unknown/Other | 17.53% (88) | 18.86% (33) | 19.67% (24) |  |
| Depression/Anxiety,  % (N)a |  |  |  |  |
| Yes | 5.67% (28) | 10.53% (18) | 22.03% (26) | <0.0001 |
| No | 94.33% (466) | 89.47% (153) | 77.97% (92) |  |
| Memory Impairment,  % (N)b | |  |  |  |
| Yes | 12.37% (61) | 18.50% (32) | 11.86% (14) | 0.11 |
| No | 87.63% (432) | 81.50% (141) | 88.14% (104) |  |
| Employment Status,  % (N)c |  |  |  |  |
| Employed | 8.15% (33) | 10.00% (11) | 8.11% (9) | 0.11 |
| Unemployed Disabled | 54.32% (220) | 60.91% (67) | 61.26% (68) |  |
| Unemployed Other | 35.06% (142) | 27.27% (30) | 24.32% (27) |  |
| Other | 2.47% (10) | 1.82% (2) | 6.31% (7) |  |
| Comorbid Conditions,  % (N)d |  |  |  |  |
| Diabetes | 9.98% (50) | 13.14% (23) | 7.50% (9) | 0.27 |
| Hypertension | 73.45% (368) | 73.71% (129) | 81.67% (98) | 0.17 |
| Heart Failure | 5.19% (26) | 5.14% (9) | 5.00% (6) | 0.99 |
| Cancer | 1.20% (6) | 3.43% (4) | 3.33% (4) | 0.10 |
| Pain | 9.18% (46) | 6.86% (12) | 7.50% (3) | 0.59 |
| COPD | 5.99% (30) | 3.43% (6) | 9.17% (11) | 0.12 |
| CVD | 19.96% (100) | 16.00% (28) | 26.67% (32) | 0.08 |
| Vascular Access, % (N)e |  |  |  |  |
| Fistula | 33.67% (169) | 32.57% (57) | 16.39% (20) | 0.002 |
| Graft | 24.70% (124) | 21.71% (38) | 24.59% (30) |  |
| Catheter | 41.63% (209) | 45.71% (80) | 59.02% (72) |  |
| *using ANOVA for continuous variables and chi-square or exact test for categorical variables. | | | | |
| a. N= 741, b. N=783, c. N=784, d. N=626, e. N=796 | | | | |

| **Supplemental Table 6.** Reported difficulty with adherence, included patients versus those excluded for not having 84 days follow-up post-assessment | | | |
| --- | --- | --- | --- |
| **Reported difficulty with:** | **Included N (%)** | **Excluded N (%)** | **P*** |
| Coming to Dialysis |  |  |  |
| Yes | 184 (23.03%) | 74 (41.34%) | <0.0001 |
| No | 615 (76.97%) | 105 (58.66%) |
| Completing Dialysis |  |  |  |
| Yes | 192 (24.03%) | 67 (37.43%) | 0.0002 |
| No | 607 (75.97%) | 112 (62.57%) |
| Fluid Restrictions |  |  |  |
| Yes | 250 (31.29%) | 73 (40.78%) | 0.01 |
| No | 549 (68.71%) | 106 (59.22%) |
| Diet Restrictions |  |  |  |
| Yes | 278 (34.79%) | 87 (48.60%) | 0.0006 |
| No | 521 (65.21%) | 92 (51.40%) |
| Diet Restrictions & Taking Medications |  |  |  |
| Neither | 502 (62.83%) | 89 (49.72%) | 0.01 |
| Either | 175 (21.90%) | 51 (28.49%) |
| Both | 122 (15.27%) | 39 (21.79%) |
| *using chi-square test | | | |
